# Supplementary material for: Revealing agricultural land ownership concentration with cadastral and company network data
Source: Springer Nature journal article supplement (doi:10.1007/s10460-024-10590-3), 2024-06-11

Appendix 1 Cumulative distribution function of the radius in which all fields of the farms in Brandenburg fall, measured from the geographical centre of all fields of a farm. As we do not know the true farmstead location, we use the geographical centre of all fields. The geographical centre is the mean of all field centroids belonging to a farm. The x-axis is cut off at 30km for illustration purposes.


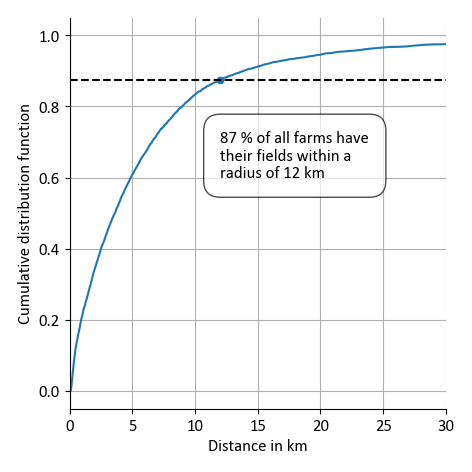

Supplement: MOESM1 [file 10460_2024_10590_MOESM1_ESM.docx]
