# Supplementary material for: Revealing agricultural land ownership concentration with cadastral and company network data
Source: Springer Nature journal article supplement (doi:10.1007/s10460-024-10590-3), 2024-06-11
Supplement: MOESM2 [file 10460_2024_10590_MOESM2_ESM.docx]

Appendix 2 Concentration measures and their formulas.

| **Concentration**  **measure** | **Formula** | **Variable**  **meaning** |
| --- | --- | --- |
| Concentration ratios () | = | is the total area of an owner, x is the number of largest owners under consideration and n is the total number of landowners. |
| Herfindahl-Hirschman index (HHI) | with | is the total area of an owner and n is the total number of landowners. |
| Gini coefficient (G) |  | is the total area of an owner and n is the total number of landowners. All landowners are sorted and indexed in ascending order. |
