# Supplementary material for: Revealing agricultural land ownership concentration with cadastral and company network data
Source: Springer Nature journal article supplement (doi:10.1007/s10460-024-10590-3), 2024-06-11

Appendix 3 Satellite images and extent of agricultural areas of six example regions with high ownership concentration measures. The top row shows regions with abundant agricultural areas, and the bottom row shows regions with scarcer agricultural areas.


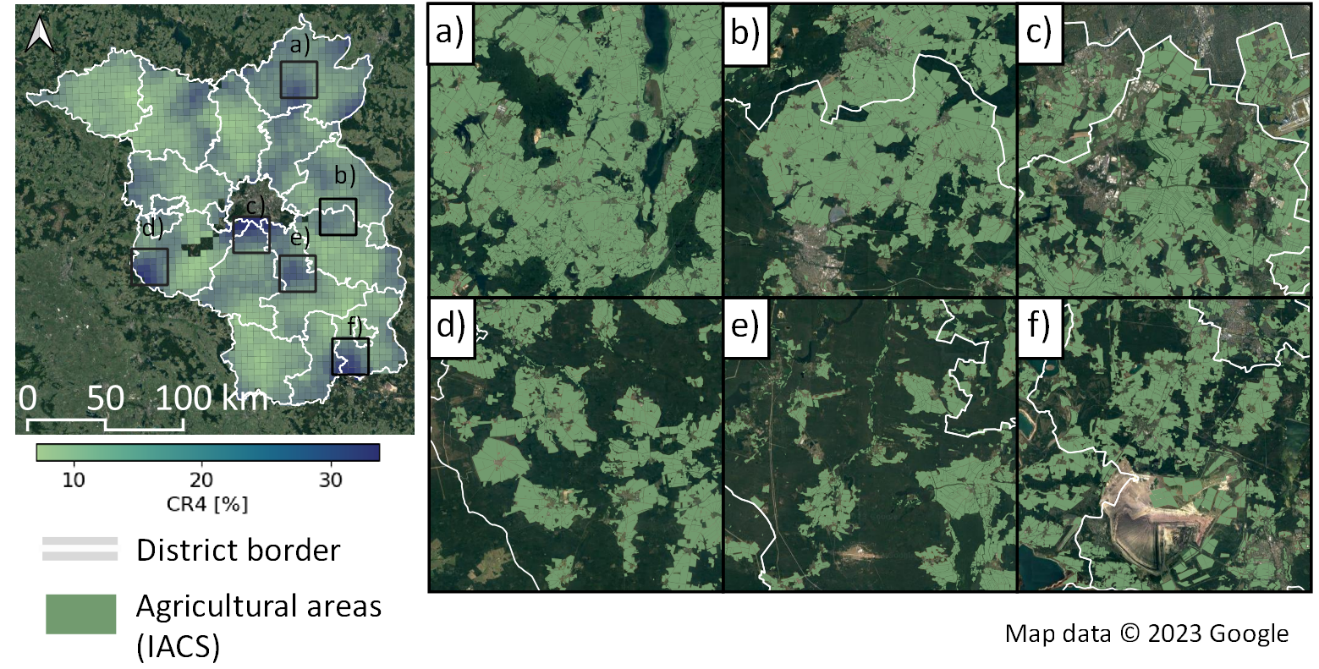

Supplement: MOESM3 [file 10460_2024_10590_MOESM3_ESM.docx]
