# Supplementary material for: Revealing agricultural land ownership concentration with cadastral and company network data
Source: Springer Nature journal article supplement (doi:10.1007/s10460-024-10590-3), 2024-06-11

Appendix 4 Spatial patterns and histograms of land ownership concentration for local land markets that were calculated with 4 km buffers around the centroids of the grid cells. The concentrations of the CR1, CR4 and HHI are much higher due to the smaller area that were considered as the local markets. a) CR1; b) CR4; c) Herfindahl-Hirschman-index (HHI); d) Gini coefficient; e) Agricultural area, f) Number of landowners.


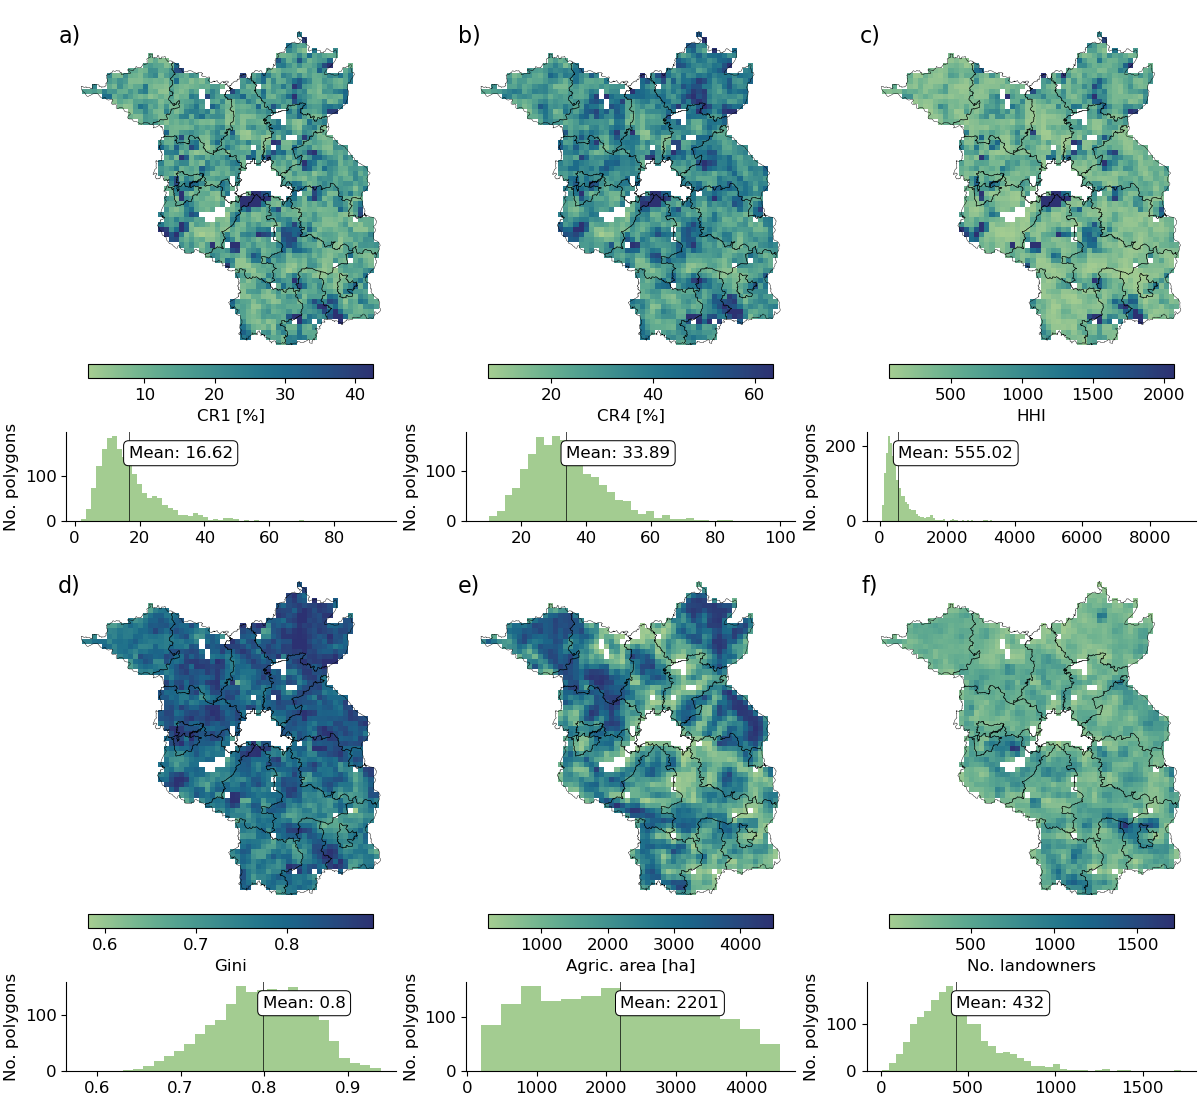

Supplement: MOESM4 [file 10460_2024_10590_MOESM4_ESM.docx]
